# Supplementary material for: Parameter estimation for sigmoid Emax models in exposure-response relationship
Source: PubMed Central journal article supplement — Transl Clin Pharmacol. 2017 Jun 15;25(2):74–84. doi: 10.12793/tcp.2017.25.2.74 (PMC7042008; doi:10.12793/tcp.2017.25.2.74), 2017-06-15
Supplement: tcp-25-74-s001.pdf [file tcp-25-74-s001.pdf]

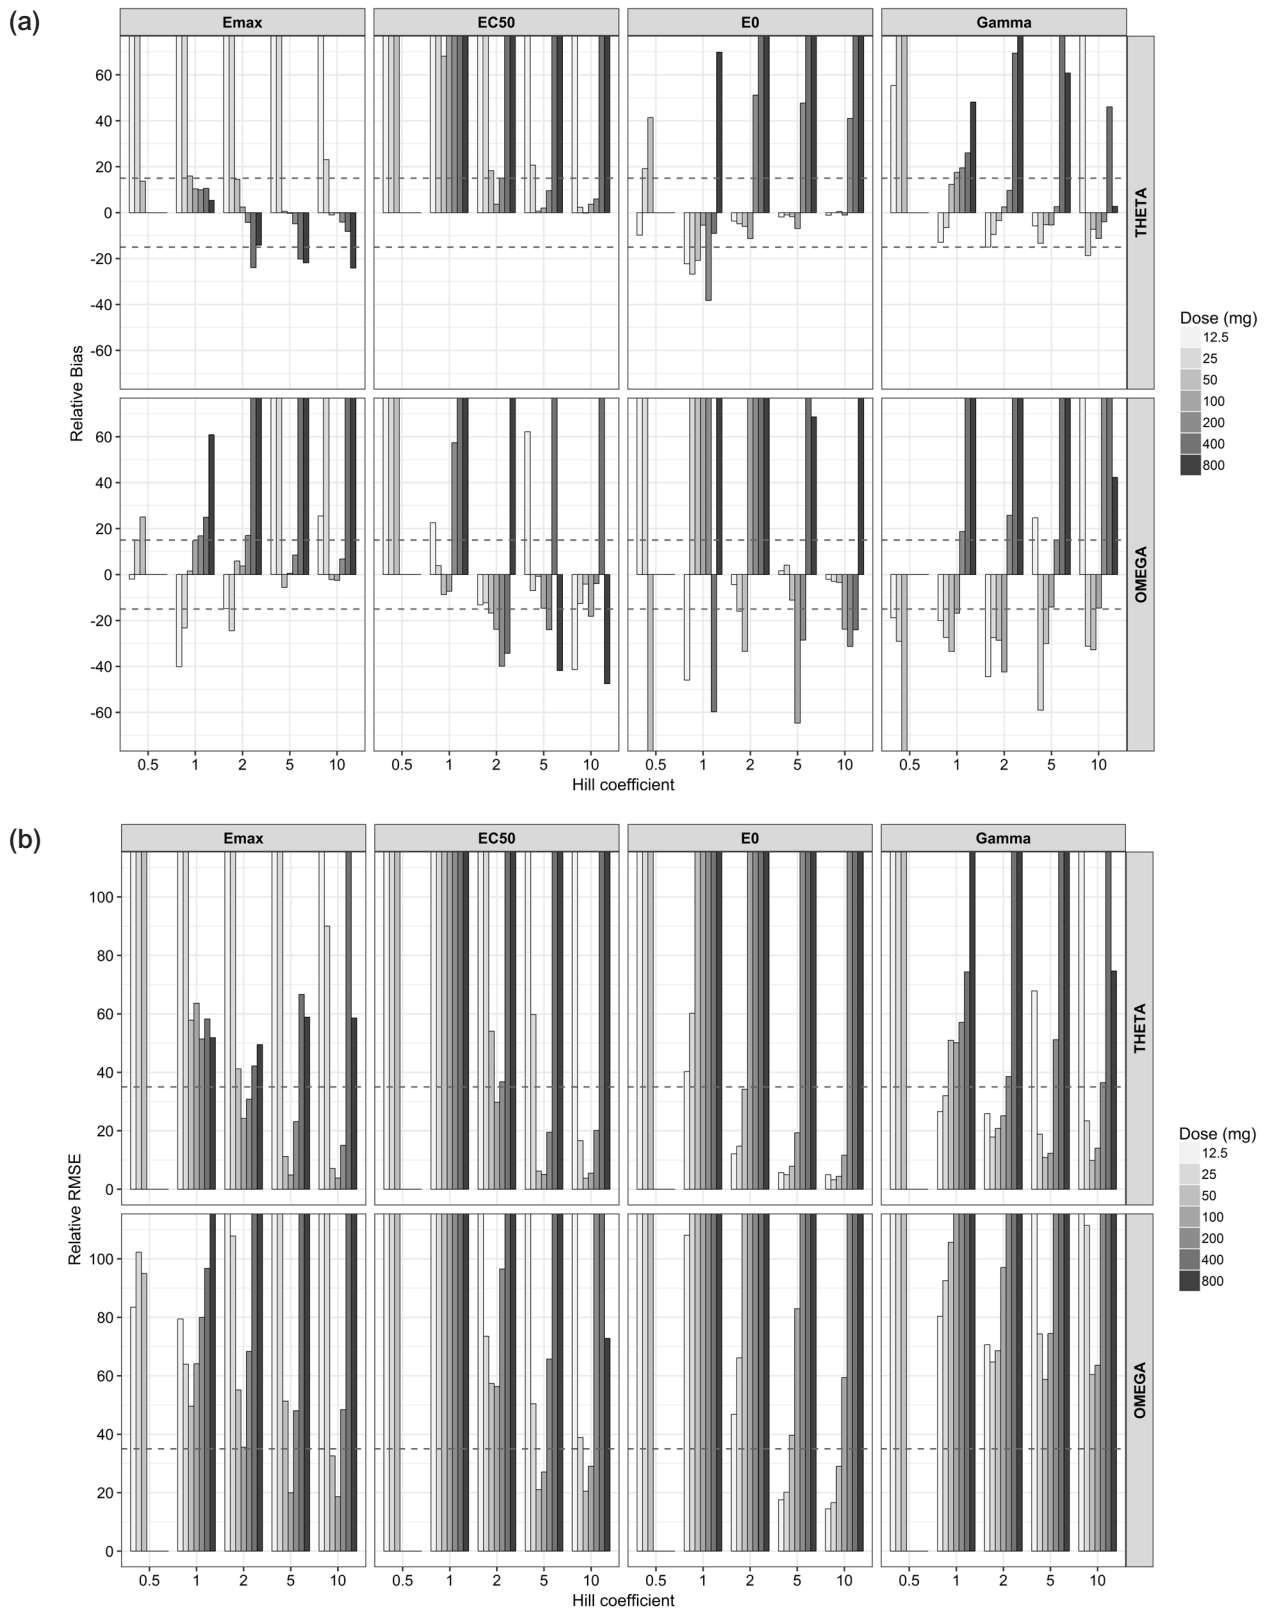

**Supplementary Figure 1.** Relative bias (a) and relative root mean square error (b) of pharmacodynamic parameters estimates for the multiple-dose scenarios.
